# Supplementary material for: Cross-Cultural Adaptation and Psychometric Validation of the Chinese Version of the Douleur Neuropathique 4 Questionnaire in Patients with Knee Osteoarthritis
Source: Research Square preprint supplement (doi:10.21203/rs.3.rs-6881253/v1), 2025-08-08
Supplement: Supplementary file 1 [file dcaeb1f63707eb13e92b22e1.docx]

**Chinese Version of the Douleur Neuropathique 4 questionnaire**

**患者访谈**

**问题 1**：您的疼痛是否具有以下一种或多种特征？（每项请勾选“是”或“否”）

|  | **是** | **否** |
| --- | --- | --- |
| 1.烧灼感 |  |  |
| 2.痛性寒冷感 |  |  |
| 3.电击样痛 |  |  |

**问题 2**：在疼痛部位是否存在以下一种或多种症状？

|  | **是** | **否** |
| --- | --- | --- |
| 4.麻刺感 |  |  |
| 5.针刺样痛 |  |  |
| 6.麻木感 |  |  |
| 7.瘙痒感 |  |  |

**患者检查**

**问题 3：**疼痛部位是否经体格检查发现以下一种或多种体征？

|  | **是** | **否** |
| --- | --- | --- |
| 8.触觉减退 |  |  |
| 9.针刺觉减退 |  |  |

**问题 4：**在疼痛部位，以下因素是否可诱发或加重疼痛？

| 10.轻触（如刷触） | **是** | **否** |
| --- | --- | --- |

**评分标准**

每项回答“否”计 0 分

每项回答“是”计 1 分

**诊断**：

总分 ≥4/10：考虑神经病理性疼痛

请选择最终分类：

（ ）伤害感受性疼痛

（ ）神经病理性疼痛

**注**：此问卷用于辅助区分神经病理性疼痛与伤害感受性疼痛，具体诊断需结合临床全面评估。
